# Supplementary material for: Palladium(ii)- and platinum(ii)-catalyzed addition of stabilized carbon nucleophiles to ethylene and propyleneElectronic supplementary information (ESI) available: experimental procedures, analytical and spectroscopic data for new compounds. See http://www.rsc.org/suppdata/cc/b3/b316734h/
Source: Royal Society of Chemistry journal article supplement (doi:10.1039/b316734h), 2004-01-01
Supplement: b316734h.doc [file b316734h.doc]

Palladium(II) and Platinum(II)-Catalyzed Addition of Stabilized Carbon Nucleophiles to Ethylene and Propylene

Xiang Wang and Ross A. Widenhoefer*

P. M. Gross Chemical Laboratory

Duke University

Durham, NC 27708–0346

## Supporting Information

Experimental procedures, analytical and spectroscopic data for new compounds (7 pages).

**Experimental**

**General Methods**. Pressurized reactions were performed behind a blast shield in a heavy-walled pressure tube equipped with a pressure gauge and a valve that allowed the pressure of the tube to be controlled throughout the transformation. The pressure tubes were evacuated prior to pressurization with olefin by freeze-pump-thawing at liquid nitrogen temperature. NMR spectra were obtained on a Varian spectrometer operating at 400 MHz for 1H NMR and 100 MHz for 13C NMR in CDCl3 unless otherwise noted. IR spectra were obtained on a Bomen MB-100 FT IR spectrometer. Gas chromatography was performed on a Hewlett-Parkard 5890 gas chromatograph equipped with a 25 m polydimethylsiloxane capillary column. Flash column chromatography was performed employing 200-400 mesh silica gel (EM). Thin layer chromatography (TLC) was performed on silica gel 60 F254 eluting with a 5:1 mixture of hexanes and ethyl acetate unless noted otherwise. Elemental analyses were performed by Complete Analysis Laboratories (Parsippany, NJ). 1,4-Dioxane (Acros, anhydrous) and HCl solution (4 N in dioxane, Aldrich) were stored in an inert atmosphere glovebox. PdCl2(CH3CN)2 (**1**) (Aldrich), [PtCl2(H2C=CH2)]2 (**5**), PtCl2, EuCl3, and anhydrous CuCl2 (Strem) were used as received. -Diketones and -keto esters existed as mixtures of enol and keto tautomers in CDCl3 solution. The predominant tautomer for each carbocycle is noted and reported NMR data correspond to this tautomer.

**(*E*)-3-Ethylidene-2,4-nonandione and (*Z*)-3-ethylidene-2,4-nonanedione [(*E*)- and (*Z*)-3].** A pressure tube containing 2,4-nonadione (156 mg, 1.00 mmol), **1** (26 mg, 0.10 mmol), CuCl2 (400 mg, 3.00 mmol) and dioxane (5 mL) was evacuated, pressurized with ethylene (200 psi), and heated to 90 °C while maintaining constant pressure. The tube was then heated at 90 °C for 20 h, cooled to room temperature, and depressurized. The reaction mixture was diluted with hexanes/ether (v/v = 1:1, 10 mL), filtered through a short plug of silica gel, and eluted with hexanes/ether (v/v = 1:1, 15 mL). The filtrate was concentrated and chromatographed (SiO2, hexanes–EtOAc = 10:1  2:1) to give (*E*)-**3** (82 mg, 45%) and (*Z*)-**3** (58 mg, 32%) as colorless oils. The regiochemistry of (*E*)-**3** and (*Z*)-**3** were established by 1H-1H NOESY analysis.

**For (*E*)-3:** TLC: R*f* = 0.32. 1H NMR:  6.76 (q, *J*  = 7.2 Hz, 1 H), 2.59 (t, *J* = 7.2 Hz, 2 H), 2.29 (d, *J* = 0.4 Hz, 3 H), 1.88 (d, *J* = 7.2 Hz, 3 H), 1.59 (quint, *J* = 7.2 Hz, 2 H), 1.21-1.33 (m, 4 H), 0.87 (t, *J* = 7.2 Hz, 3 H). 13C NMR: 203.9, 199.6, 146.1, 140.6, 38.2, 31.7, 31.6, 24.1, 22.6, 15.6, 14.1. IR (neat, cm-1): 2957, 2932, 1720, 1710. Anal. calcd (found) for C11H18O2: C, 72.49 (72.20); H, 9.95 (10.11).

**For (*Z*)-3:** TLC: R*f* = 0.26. 1H NMR:  6.77 (q, *J* = 3.2 Hz, 1 H), 2.55 (t, *J* = 7.6 Hz, 2 H), 2.29 (s, 3 H), 1.86 (d, *J* = 7.2 Hz, 3 H), 1.60 (quint, *J* = 7.2 Hz, 2 H), 1.25-1.33 (m, 4 H), 0.87 (t, *J* = 7.2 Hz, 3 H). 13C NMR:  206.5, 197.2, 146.5, 141.6, 44.3, 31.5, 26.2, 23.2, 22.6, 15.7, 14.1. IR (neat, cm-1): 2956, 2931, 1711, 1697.

**2,6-Dimethyl-4-ethylidene-3,5-heptanedione (Table 2, entry 1).**  TLC: R*f* = 0.37. 1H NMR:  6.76 (q, *J* = 7.2 Hz, 1 H), 3.11 (septet, *J* = 6.8 Hz, 1 H), 2.72 (septet, *J* = 6.8 Hz, 1 H), 1.79 (d, *J* = 7.2 Hz, 3 H), 1.05 (d, *J* = 6.8 Hz, 6 H), 1.02 (d, *J* = 7.2 Hz, 6 H). 13C NMR:  209.2, 202.9, 143.6, 139.4, 40.2, 34.1, 18.3, 16.8, 15.0. IR (neat, cm-1): 2974, 2936, 1703, 1697, 1468. Anal. calcd (found) for C11H18O2: C, 72.49 (72.38); H, 9.95 (10.00).

**2,2,6,6-Tetramethyl-4-vinyl-3,5-heptanedione (Table 2, entry 2)**. TLC: R*f* = 0.58. 1H NMR:  5.84 (ddd, *J* = 9.6, 10.0, 17.2 Hz, 1 H), 5.20 (dd, *J* = 0.8, 14.0 Hz, 1 H), 5.12-5.17 (m, 2 H), 1.09 (s, 18 H). 13C NMR:  208.4, 133.4, 119.9, 60.0, 45.5, 27.3. IR (neat, cm-1): 2969, 1722, 1715, 1479. Anal. calcd (found) for C13H22O2: C, 74.24 (74.10); H, 10.54 (10.39).

**(*E*)-5,5-Dimethyl-3-ethylidene-2,4-hexanedione (Table 2, entry 3).** TLC: R*f* = 0.23. 1H NMR:  6.60 (q, *J* = 7.2 Hz, 1 H), 2.23 (s, 3 H), 1.74 (d, *J* = 7.2 Hz, 3 H), 1.06 (s, 9 H). 13C NMR:  213.9, 197.2, 146.9, 139.6, 44.5, 26.9, 25.8, 16.3. IR (neat, cm-1): 2971, 1697, 1665, 1267. Anal. calcd (found) for C10H16O2: C, 71.39 (71.25); H, 9.59 (9.17).

**Ethyl 2-(2,2-dimethylpropionyl)-2-butenoate (Table 2, entry 4).** TLC: R*f* = 0.75. 1H NMR:  6.88 (q, *J* = 7.2 Hz, 1 H), 4.17 (q, *J* = 7.2 Hz, 2 H), 1.74 (d, *J* = 7.2 Hz, 3 H), 1.24 (t, *J* = 7.2 Hz, 3 H), 1.15 (s, 9 H). 13C NMR:  211.8, 164.5, 140.5, 136.8, 61.2, 44.8, 27.1, 15.8, 14.3. IR (neat, cm-1): 2979, 1727, 1694, 1243. Anal. calcd (found) for C11H18O3: C, 66.64 (66.35); H, 9.15 (9.02).

**Reaction of 3,5-heptanedione with propene catalyzed by 1 (Table 2, entry 5).** A pressure tube containing 3,5-heptanedione (128 mg, 1.00 mmol), **1** (26 mg, 0.10 mmol), EuCl3 (260 mg, 1.00 mmol), CuCl2 (400 mg, 3.0 mmol) and dioxane (2 mL) was evacuated, pressurized to 150 psi with propene and heated to 100 °C while maintaining constant pressure. The tube was then heated at 100 °C for 24 h, cooled to room temperature, and depressurized. The reaction mixture was treated with aqueous HCl (1 N, 20 mL) and extracted with ether (3  20 mL). The combined ether extracts were dried (MgSO4), concentrated, and chromatographed (SiO2, hexanes–EtOAc = 20:1  5:1) to give 2-ethyl-5-methyl-3-propionylfuran (85 mg, 51%) and 4-isopropylidene-3,5-heptanedione (40 mg, 24%) as colorless oils.

**For 4-isopropylidene-3,5-heptanedione:** TLC: R*f* = 0.33. 1H NMR:  2.51 (q, *J* = 7.2 Hz, 4 H), 1.89 (s, 6 H), 1.08 (t, *J* = 7.2 Hz, 6 H). 13C NMR:  204.4, 147.2, 141.6, 37.3, 23.9, 8.0. IR (neat, cm-1): 2978, 2940, 1681, 1461, 1158. Anal. calcd (found) for C10H16O2: C, 71.39 (71.42); H, 9.59 (9.65).

**For 2-ethyl-5-methyl-3-propionylfuran:** TLC: R*f* = 0.62. 1H NMR (300 MHz):  6.15 (s, 1 H), 2.94 (q, *J* = 7.5 Hz, 2 H), 2.66 (t, *J* = 7.2 Hz, 3 H), 2.22 (s, 3 H), 1.19 (t, *J* = 7.5 Hz, 3 H), 1.10 (t, *J* = 7.2 Hz, 3 H). 13C NMR:  196.5, 161.1, 149.0, 119.8, 104.9, 33.6, 20.9, 12.5, 11.4, 7.2. IR (neat, cm-1): 2978, 1675, 1580. Anal. calcd (found) for C10H14O2: C, 72.26 (72.15); H, 8.49 (8.26).

**3-Propylidene-2,4-nonanedione (Table 2, entry 6).** TLC: R*f* = 0.33. 1H NMR:  2.50 (t, *J* = 7.2 Hz, 2 H), 2.24 (s, 3 H), 1.94 (s, 3 H), 1.87 (s, 3 H), 1.56-1.64 (m, 2 H), 1.23-1.34 (m, 4 H), 0.88 (t, *J* = 7.2 Hz, 3 H). 13C NMR:  204.9, 200.5, 147.7, 142.0, 44.2, 31.5, 23.5, 23.3, 23.0, 22.7, 14.1. IR (neat, cm-1): 2958, 2932, 1687, 1681. Anal. calcd (found) for C10H20O2: C, 73.43 (73.29); H, 10.27 (10.22).

**2-Ethyl-5-methyl-3-(1-oxa-hexyl)furan (Table 2, entry 6).** TLC: R*f* = 0.69. 1H NMR:  6.16 (s, 1 H), 2.91 (t, *J* = 7.6 Hz, 2 H), 2.34 (d, *J* = 0.8 Hz, 3 H), 2.24 (s, 3 H), 1.59-1.66 (m, 2 H), 1.28-1.32 (m, 4 H), 0.87 (t, *J* = 7.2 Hz, 3 H). 13C NMR:  194.4, 161.3, 150.0, 121.7, 106.3, 31.6, 29.4, 28.2, 27.8, 22.6, 14.1, 13.4. IR (neat, cm-1): 2957, 2931, 1674, 1558, 1380. Anal. calcd (found) for C12H18O2: C, 74.19 (74.06); H, 9.34 (9.19).

**3-Acetyl-5-methyl-2-pentylfuran (Table 2, entry 6).** TLC: R*f* = 0.45. 1H NMR:  6.18 (s, 3 H), 2.64 (t, *J* = 7.6 Hz, 2 H), 2.53 (s, 3 H), 2.24 (s, 3 H), 1.61-1.69 (m, 2 H), 1.28-1.36 (m, 4 H), 0.89 (t, *J* = 7.2 Hz, 3 H). 13C NMR:  197.3, 157.0, 150.0, 121.9, 105.9, 41.4, 31.7, 24.0, 22.7, 14.5, 14.1, 13.4. IR (neat, cm-1): 2957, 2931, 2972, 1713, 1694. Anal. calcd (found) for C12H18O2: C, 74.19 (74.15); H, 9.34 (9.22).

**3-Ethyl-2,4-nonanedione (4).** A pressure tube containing **2** (156 mg, 1.00 mmol), **5** (15 mg, 0.05 mmol), HCl (25 L of a 4 N solution in dioxane, 0.10 mmol) and dioxane (0.5 mL) was evacuated, pressurized to 50 psi with ethylene and heated “

90 °C while maintaining constant pressure. The tube was heated at 90 °C for 5 h, cooled to room temperature, and depressurized. The reaction mixture was diluted with hexanes:ether (v/v = 1:1, 20 mL) and filtered through a short plug of silica gel, which was washed with hexanes:ether (v/v = 1:1, 20 mL). The filtrate was concentrated and chromatographed (SiO2, hexanes–EtOAc = 10:1  2:1) to give **4** (125 mg, 68%) as a colorless oil.

**For 4**:1 TLC: R*f* = 0.48. keto:enol = 2:1. 1H NMR (keto tautormer):  3.53 (t, *J* = 7.2 Hz, 1 H), 2.13 (s, 3 H), 1.84-1.87 (m, 2 H), 1.53 (quint, *J* = 7.2 Hz, 2 H), 1.20-1.31 (m, 6 H), 0.84-0.88 (m, 6 H). 13C NMR (keto and enol): 206.8, 204.8, 194.0, 191.0, 111.7, 70.2, 42.6, 35.2, 31.8, 31.4, 28.9, 25.6, 23.2, 22.9, 22.7, 22.6, 22.0, 20.4, 15.4, 14.1, 14.0, 12.3.

**3-Ethyl-1-phenyl-1,3-butanedione (Scheme 1).**2 TLC: R*f* = 0.35. Enol:keto  1:50. 1H NMR:  7.05-7.97 (m, 2 H), 7.56 (tt, *J* = 1.2, 7.2 Hz, 1 H), 7.42-7.47 (m, 2 H), 4.34 (t, *J* = 7.2 Hz, 1 H), 2.11 (s, 3 H), 1.93-2.08 (m, 2 H), 0.92(t, 3 H). 13C NMR:  204.6, 196.7, 136.8, 133.9, 129.0, 128.8, 65.2, 28.0, 22.6, 12.3.

**2-Ethyl-1-(2-furanyl)-1,3-butanedione (Scheme 1).** TLC: R*f* = 0.19. Enol:keto  1:50. 1H NMR:  7.57 (dd, *J* = 0.8, 1.6 Hz, 1 H), 7.23 (dd, *J* = 0.8, 3.6 Hz, 1 H), 6.51 (dd, *J* = 1.6, 3.6 Hz, 1 H),4.83 (t, *J* = 7.2 Hz, 1 H), 3.12 (s, 3 H), 1.86-2.02 (m, 2 H), 0.88 (t, *J* = 7.2 Hz, 3 H). 13C NMR:  204.0, 185.1, 152.5, 147.4, 119.0, 112.9, 65.0, 28.6, 22.1, 12.2. IR (neat, cm-1): 2969, 2936, 1721, 1666. Anal. calcd (found) for C10H12O2: C, 66.65 (66.47); H, 6.71 (6.76).

References

1. Hooz, J.; Oudenes, J. *Synth. Comm.* **1982**, *12*, 189.

2. Paine, J. B., III; Brough, J. R.; Buller, Kathy K.; Erikson, E. E. *J. Org. Chem*. **1987**, *52*, 3986.
